# Supplementary material for: Model representation of the coupling between evapotranspiration and soil water content at different depths
Source: Copernicus journal article supplement (doi:10.5194/hess-24-581-2020), 2020-02-07
Supplement: Supplementary file 1 [file hess-24-581-2020-supplement.pdf]

Supplement of Hydrol. Earth Syst. Sci., 24, 581–594, 2020  
<https://doi.org/10.5194/hess-24-581-2020-supplement>  
© Author(s) 2020. This work is distributed under  
the Creative Commons Attribution 4.0 License.

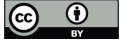

*Supplement of*

## **Model representation of the coupling between evapotranspiration and soil water content at different depths**

**Jianxiu Qiu et al.**

*Correspondence to:* Jianxiu Qiu ([qiujianxiu@mail.sysu.edu.cn](mailto:qiujianxiu@mail.sysu.edu.cn))

The copyright of individual parts of the supplement might differ from the CC BY 4.0 License.

Table S1 Complete NOAAHMP configuration

| Physical Process                             | Available Noah-MP Options                                                                                                                                                                                                                                                                                                       | Option Used Here                  |
|----------------------------------------------|---------------------------------------------------------------------------------------------------------------------------------------------------------------------------------------------------------------------------------------------------------------------------------------------------------------------------------|-----------------------------------|
| Vegetation                                   | <ul style="list-style-type: none"> <li>· Prescribed LAI and shade fraction</li> <li>· LAI and shade fraction from dynamic carbon uptake and partitioning</li> <li>· Shade fraction calculated from prescribed LAI</li> <li>· Prescribed LAI and constant shade fraction</li> </ul>                                              | Prescribed LAI and shade fraction |
| Stomatal resistance                          | <ul style="list-style-type: none"> <li>· Ball-Berry (Ball et al., 1987)</li> <li>· Jarvis (Chen et al., 1996)</li> </ul>                                                                                                                                                                                                        | Ball-Berry                        |
| Soil moisture factor for stomatal resistance | <ul style="list-style-type: none"> <li>· Noah-type (based on soil moisture)</li> <li>· CLM-type (based on stomatal resistance) (Oleson et al., 2010)</li> <li>· SSiB-type (based on stomatal resistance) (Xue et al., 1991)</li> </ul>                                                                                          | Noah-type                         |
| Runoff & groundwater                         | <ul style="list-style-type: none"> <li>· TOPMODEL with groundwater (Niu et al., 2007)</li> <li>· TOPMODEL with equilibrium water table (Niu et al., 2005)</li> <li>· Infiltration-excess surface runoff and free drainage (Schaake et al., 1996)</li> <li>· BATS runoff and free drainage (Yang and Dickinson, 1996)</li> </ul> | TOPMODEL with groundwater         |
| Surface layer drag coefficient               | <ul style="list-style-type: none"> <li>· Monin-Obukhov</li> <li>· Noah-type (Chen et al., 1997)</li> </ul>                                                                                                                                                                                                                      | Monin-Obukhov                     |
| Super-cooled liquid water                    | <ul style="list-style-type: none"> <li>· No iteration (Niu and Yang, 2006)</li> <li>· With iteration (Koren et al., 1999)</li> </ul>                                                                                                                                                                                            | No iteration                      |
| Frozen soil permeability                     | <ul style="list-style-type: none"> <li>· Linear: Hydraulic Properties from total soil moisture (Niu and Yang, 2006)</li> <li>· Nonlinear: Hydraulic properties from liquid water only (Koren et al., 1999)</li> </ul>                                                                                                           | Linear: Total soil moisture       |
| Radiation transfer                           | <ul style="list-style-type: none"> <li>· Two-stream w/ 3D structure</li> <li>· Two-stream (Niu and Yang, 2004)</li> <li>· Two-stream with canopy gap equal to 1-(shade fraction)</li> </ul>                                                                                                                                     | Two-stream w/ 3D structure        |
| Snow albedo                                  | <ul style="list-style-type: none"> <li>· BATS (snow age, grain size growth, impurity) (Yang et al., 1997)</li> <li>· CLASS (only snow age) (Verseghy, 1991)</li> </ul>                                                                                                                                                          | CLASS                             |
| Frozen/liquid partitioning                   | <ul style="list-style-type: none"> <li>· Jordan (1991)</li> <li>· Offset threshold: <math>T_{air} &lt; T_{frz} + 2.2K</math></li> <li>· Standard threshold: <math>T_{air} &lt; T_{frz}</math></li> </ul>                                                                                                                        | Jordan (1991)                     |
| Bottom soil temperature                      | <ul style="list-style-type: none"> <li>· Zero heat flux</li> <li>· Prescribed (8m) bottom temp</li> </ul>                                                                                                                                                                                                                       | Prescribed (8m) bottom temp       |
| Soil temperature solution                    | <ul style="list-style-type: none"> <li>· Semi-implicit</li> <li>· Full implicit</li> </ul>                                                                                                                                                                                                                                      | Semi-implicit                     |
